# Supplementary material
Source: PubMed Central journal article supplement (PMC2978764)

## Supplemental Figure Legend

### **Fig. S1. p53-independent PUMA induction by staurosporine in colon cancer cells.**

**A.** *p53*-KO HCT116 cells were treated with 60 nM staurosporine (STS). After total RNA was isolated at indicated time points, real-time RT PCR was used to analyze PUMA mRNA expression. **B.** PUMA protein expression at indicated time points in *p53*-KO HCT116 cells treated with 60 nM STS was probed by Western blotting. **C.** WT HCT116, *p53*-KO HCT116, and *p53*-deficient DLD1 cells were treated with increasing doses of STS for 24 hr. Western blotting was performed to analyze PUMA expression.

### **Fig. S2. Induction of PUMA by FoxO3a and inhibitors of the PI3K pathway.**

**A.** *p53*-KO HCT116 cells were transfected with FoxO3a triple mutant (FoxO3a<sup>TM</sup>) or the control empty vector for 24 hr. PUMA and FoxO3a expression was analyzed by Western blotting. **B.** WT and *p53*-KO HCT116 cells were treated for 24 hr with 5  $\mu$ M wortmannin, 1  $\mu$ M UCN-01, or 50  $\mu$ M LY294002. PUMA expression was analyzed by Western blotting.

### **Fig. S3. UCN-01-induced and PUMA-dependent apoptosis in colon cancer cells.**

**A.** WT and *PUMA*-KO DLD1 colon cancer cells were treated with 3  $\mu$ M UCN-01 for 48 hr. Apoptosis was analyzed by nuclear staining with Hoechst 33258. **B.** *p21*-KO and *p21/PUMA*-KO HCT116 cells were treated with 2  $\mu$ M UCN-01 for 36 hr. Cells were stained with annexin V/PI and analyzed by flow cytometry. The percentages of Annexin-positive cells are indicated in the right quadrants. **C.** After treatment as in **B**, mitochondrial membrane potential was analyzed by mitotracker staining followed by flow cytometry. **D.** Left: Parental and stable *FoxO3a*-knockdown (*FoxO3a*-KD) *p21*-KO HCT116 cells were treated with 1  $\mu$ M UCN-01 and blotted for PUMA and FoxO3a

expression. Right: Parental and *FoxO3a*-KD *p21*-KO cells were treated with 3  $\mu$ M UCN-01 for 48 hr. Apoptosis was determined by nuclear staining.

**Fig. S4. PUMA mediates the chemosensitization effect of UCN-01.**

**A.** *p21*-KO and *p21*-KO/*PUMA*-KO HCT116 cells were treated with 50  $\mu$ M cisplatin for 48 hr. Apoptosis was analyzed by nuclear staining. **B.** Caspase 3 activation in cells analyzed in **A.** **C.** *p21*-KO and *p21*-KO/*PUMA*-KO HCT116 cells were treated with 0.5  $\mu$ M UCN-01, 50  $\mu$ M cisplatin, or their combination for 48 hr. Caspase 3 activation was analyzed by Western blotting.

**Fig. S5. PUMA-dependent apoptosis in xenograft tumors treated with UCN-01.**

*p21*-KO or *p21*-KO/*PUMA*-KO HCT116 cells were treated with 9 mg/kg UCN-01 or control sodium citrate buffer by i.p. injection for 5 consecutive days as described in Figure 6. Paraffin-embedded tumor sections were analyzed by immunostaining. **A.** TUNEL staining (400 $\times$ ). **B.** Active caspase 3 staining (400 $\times$ ).



**Figure S2**

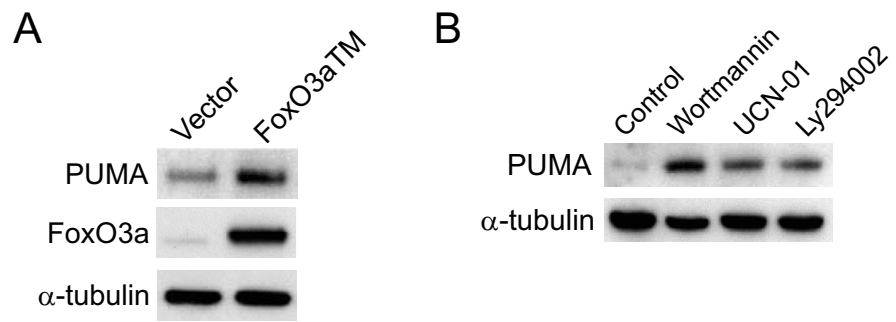

**Figure S3**

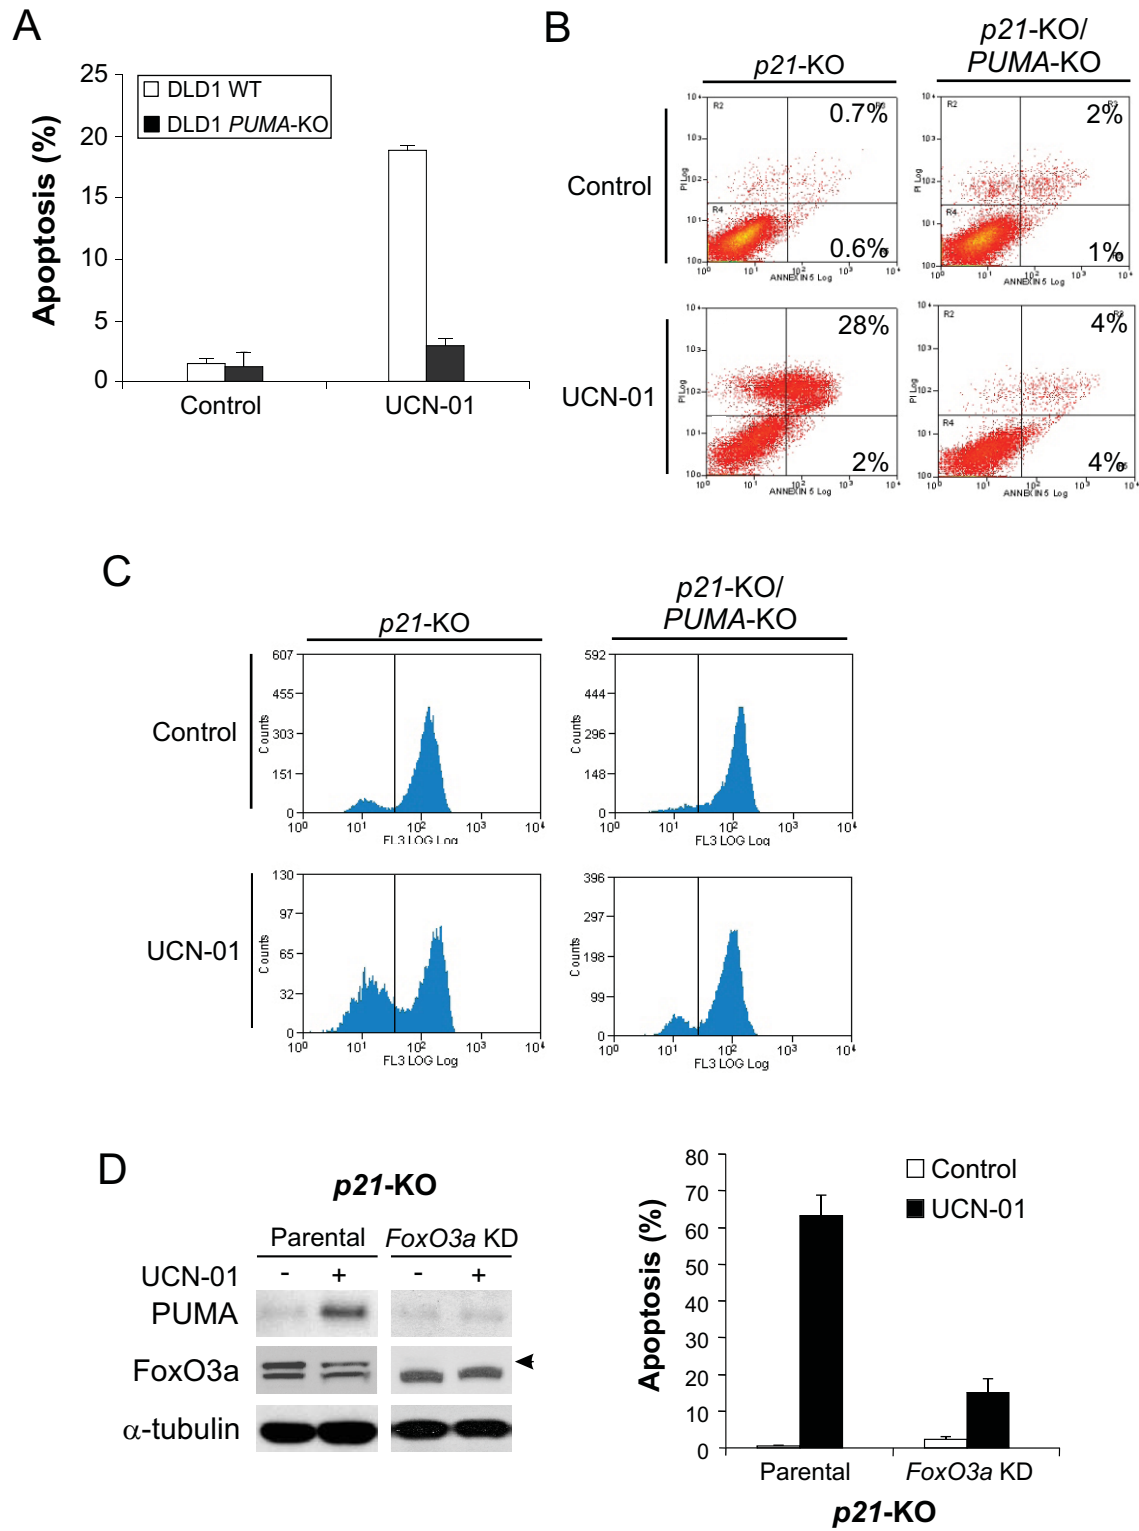

**Figure S4**

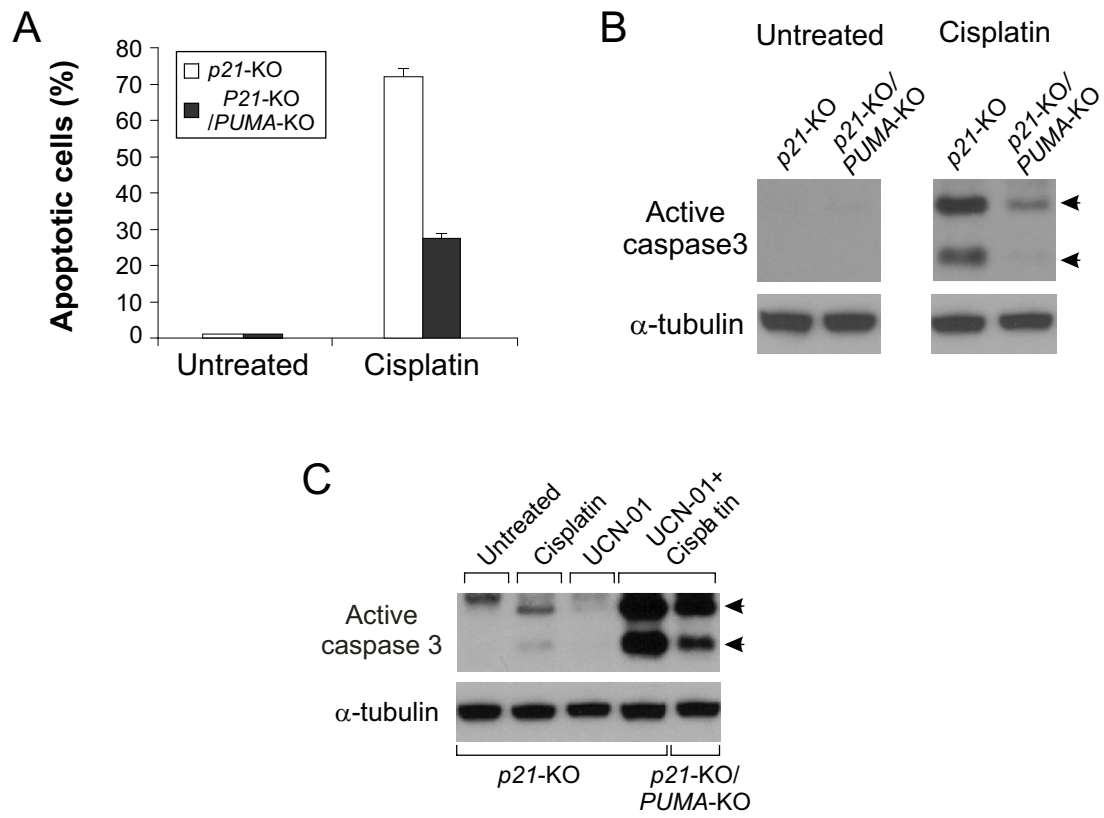

**Figure S5**

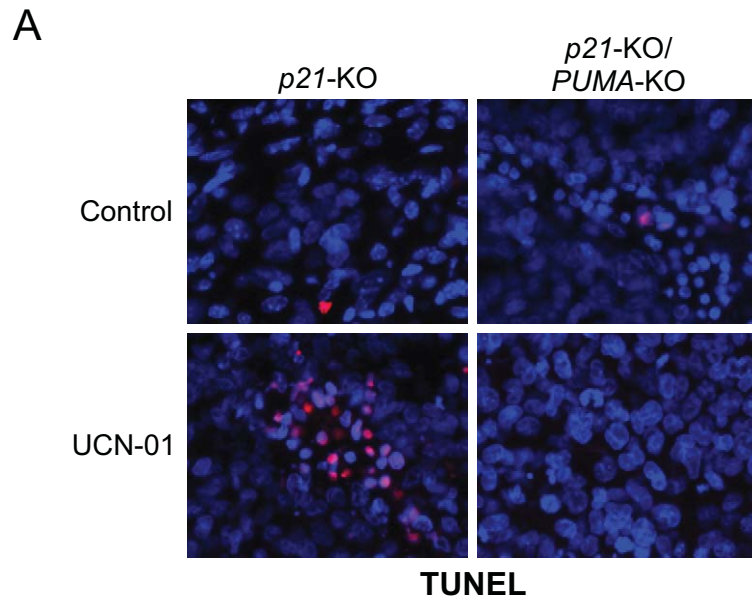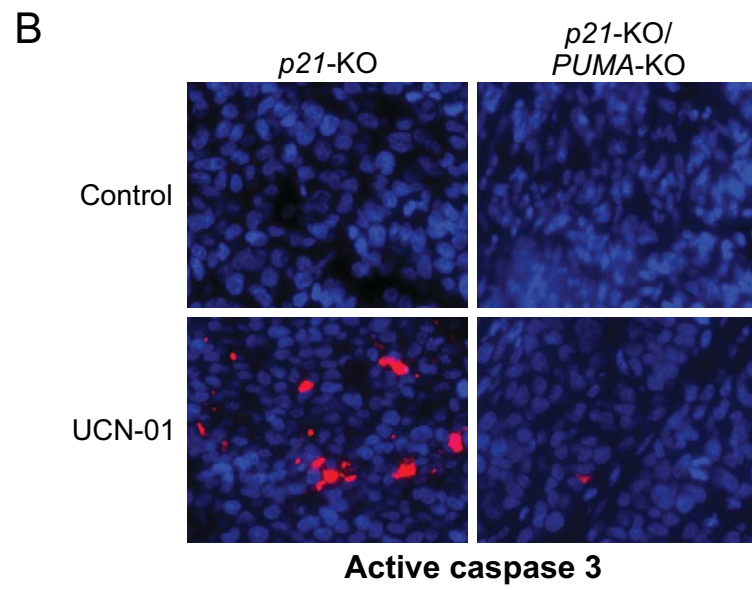

Supplement: NIHMS235011-supplement-1.pdf [file NIHMS235011-supplement-1.pdf]
